# Supplementary material for: Structural and kinetic insights into the stereospecific oxidation of R-2,3-dihydroxypropanesulfonate by DHPS-3-dehydrogenase from Cupriavidus pinatubonensis
Source: Chem Sci. 2024 Sep 9;15(38):15757–68. doi: 10.1039/d4sc05114a (PMC11382572; doi:10.1039/d4sc05114a)
Supplement: SC-015-D4SC05114A-s001 [file SC-015-D4SC05114A-s001.xlsx]

## Sheet: 272_HpsN
Entry	Reviewed	Entry Name	Protein names	Gene Names	Organism	Length
Q46N53	reviewed	HPSN_CUPPJ	Sulfopropanediol 3-dehydrogenase (EC 1.1.1.308) (2,3-dihydroxypropane-1-sulfonate 3-dehydrogenase (sulfolactate forming)) (DHPS 3-dehydrogenase (sulfolactate forming))	hpsN Reut_C6092	Cupriavidus pinatubonensis (strain JMP 134 / LMG 1197) (Cupriavidus necator (strain JMP 134))	436
A0A017HSZ4	unreviewed	A0A017HSZ4_9RHOB	Putative histidinol dehydrogenase (But probably not)	Rumeso_00916	Rubellimicrobium mesophilum DSM 19309	438
A0A061SSX1	unreviewed	A0A061SSX1_9RHOB	Sulfopropanediol 3-dehydrogenase (EC 1.1.1.308) (2,3-dihydroxypropane-1-sulfonate 3-dehydrogenase (sulfolactate forming)) (DHPS 3-dehydrogenase (sulfolactate forming))	hpsN PM02_12715	Sulfitobacter mediterraneus	435
A0A061SWF0	unreviewed	A0A061SWF0_9RHOB	Sulfopropanediol 3-dehydrogenase (EC 1.1.1.308) (2,3-dihydroxypropane-1-sulfonate 3-dehydrogenase (sulfolactate forming)) (DHPS 3-dehydrogenase (sulfolactate forming))	hpsN PM02_02335	Sulfitobacter mediterraneus	435
A0A068YV63	unreviewed	A0A068YV63_9BURK	Sulfopropanediol 3-dehydrogenase (EC 1.1.1.308) (2,3-dihydroxypropane-1-sulfonate 3-dehydrogenase (sulfolactate forming)) (DHPS 3-dehydrogenase (sulfolactate forming))	hpsN	Polaromonas sp. CG9_12	437
A0A073J3R7	unreviewed	A0A073J3R7_9RHOB	Sulfopropanediol 3-dehydrogenase (EC 1.1.1.308) (2,3-dihydroxypropane-1-sulfonate 3-dehydrogenase (sulfolactate forming)) (DHPS 3-dehydrogenase (sulfolactate forming))	hpsN SUH3_14675	Pseudosulfitobacter pseudonitzschiae	435
A0A074JH59	unreviewed	A0A074JH59_9RHOB	Histidinal dehydrogenase	TP2_16810	Thioclava pacifica DSM 10166	436
A0A099TBP3	unreviewed	A0A099TBP3_9RHOB	Sulfopropanediol 3-dehydrogenase (EC 1.1.1.308) (2,3-dihydroxypropane-1-sulfonate 3-dehydrogenase (sulfolactate forming)) (DHPS 3-dehydrogenase (sulfolactate forming))	hpsN PM04_01420	Thalassobacter sp. 16PALIMAR09	435
A0A0B4D243	unreviewed	A0A0B4D243_9RHOB	Sulfopropanediol 3-dehydrogenase (EC 1.1.1.308) (2,3-dihydroxypropane-1-sulfonate 3-dehydrogenase (sulfolactate forming)) (DHPS 3-dehydrogenase (sulfolactate forming))	hpsN RA29_14365	Tateyamaria sp. ANG-S1	435
A0A0C1JGQ6	unreviewed	A0A0C1JGQ6_9RHOB	Sulfopropanediol 3-dehydrogenase (EC 1.1.1.308) (2,3-dihydroxypropane-1-sulfonate 3-dehydrogenase (sulfolactate forming)) (DHPS 3-dehydrogenase (sulfolactate forming))	hpsN RA28_07220	Ruegeria sp. ANG-S4	435
A0A0G3EQ21	unreviewed	A0A0G3EQ21_9BURK	Sulfopropanediol 3-dehydrogenase (EC 1.1.1.308) (2,3-dihydroxypropane-1-sulfonate 3-dehydrogenase (sulfolactate forming)) (DHPS 3-dehydrogenase (sulfolactate forming))	hpsN ABW99_14130	Pandoraea thiooxydans	437
A0A0J9H3P7	unreviewed	A0A0J9H3P7_9RHOB	Putative histidinol dehydrogenase	AIOL_000456	Candidatus Rhodobacter lobularis	435
A0A0K0YA47	unreviewed	A0A0K0YA47_9RHOB	Sulfopropanediol 3-dehydrogenase (EC 1.1.1.308) (2,3-dihydroxypropane-1-sulfonate 3-dehydrogenase (sulfolactate forming)) (DHPS 3-dehydrogenase (sulfolactate forming))	hpsN OSB_32490	Octadecabacter temperatus	434
A0A0K8P5H8	unreviewed	A0A0K8P5H8_IDESA	Sulfopropanediol 3-dehydrogenase (EC 1.1.1.308) (2,3-dihydroxypropane-1-sulfonate 3-dehydrogenase (sulfolactate forming)) (DHPS 3-dehydrogenase (sulfolactate forming))	hpsN ISF6_3315	Ideonella sakaiensis (strain NBRC 110686 / TISTR 2288 / 201-F6)	437
A0A0L0MIL4	unreviewed	A0A0L0MIL4_9BURK	Sulfopropanediol 3-dehydrogenase (EC 1.1.1.308) (2,3-dihydroxypropane-1-sulfonate 3-dehydrogenase (sulfolactate forming)) (DHPS 3-dehydrogenase (sulfolactate forming))	hpsN BVER_02059	Candidatus Burkholderia verschuerenii	437
A0A0L1JQL1	unreviewed	A0A0L1JQL1_9RHOB	Sulfopropanediol 3-dehydrogenase (EC 1.1.1.308) (2,3-dihydroxypropane-1-sulfonate 3-dehydrogenase (sulfolactate forming)) (DHPS 3-dehydrogenase (sulfolactate forming))	hpsN ATO11_07440	Pseudaestuariivita atlantica	435
A0A0L6CTD6	unreviewed	A0A0L6CTD6_9RHOB	Sulfopropanediol 3-dehydrogenase (EC 1.1.1.308) (2,3-dihydroxypropane-1-sulfonate 3-dehydrogenase (sulfolactate forming)) (DHPS 3-dehydrogenase (sulfolactate forming))	hpsN_2 hpsN ROTO_24080	Roseovarius tolerans	435
A0A0L6TC45	unreviewed	A0A0L6TC45_9BURK	Histidinol dehydrogenase (EC 1.1.1.23)	AD742_06230	Methylibium sp. NZG	439
A0A0L6TDE5	unreviewed	A0A0L6TDE5_9BURK	Sulfopropanediol 3-dehydrogenase (EC 1.1.1.308) (2,3-dihydroxypropane-1-sulfonate 3-dehydrogenase (sulfolactate forming)) (DHPS 3-dehydrogenase (sulfolactate forming))	hpsN AD742_06185	Methylibium sp. NZG	437
A0A0M4LC88	unreviewed	A0A0M4LC88_9GAMM	Histidinal dehydrogenase	W908_01090	Candidatus Pseudothioglobus singularis PS1	434
A0A0M6XRM7	unreviewed	A0A0M6XRM7_9RHOB	Sulfopropanediol 3-dehydrogenase (EC 1.1.1.308) (2,3-dihydroxypropane-1-sulfonate 3-dehydrogenase (sulfolactate forming)) (DHPS 3-dehydrogenase (sulfolactate forming))	hpsN_1 hpsN JAN5088_01456	Jannaschia rubra	435
A0A0M6YPK7	unreviewed	A0A0M6YPK7_9RHOB	Sulfopropanediol 3-dehydrogenase (EC 1.1.1.308)	hpsN_2 JDO7802_03226	Jannaschia donghaensis	425
A0A0M6ZCM6	unreviewed	A0A0M6ZCM6_9HYPH	Sulfopropanediol 3-dehydrogenase (EC 1.1.1.308) (2,3-dihydroxypropane-1-sulfonate 3-dehydrogenase (sulfolactate forming)) (DHPS 3-dehydrogenase (sulfolactate forming))	hpsN_2 hpsN LA5096_04982	Roseibium album	437
A0A0M7A2Z5	unreviewed	A0A0M7A2Z5_9HYPH	Sulfopropanediol 3-dehydrogenase (EC 1.1.1.308) (2,3-dihydroxypropane-1-sulfonate 3-dehydrogenase (sulfolactate forming)) (DHPS 3-dehydrogenase (sulfolactate forming))	hpsN LAX5112_02113	Roseibium alexandrii	437
A0A0M9EJV3	unreviewed	A0A0M9EJV3_9RHOB	Sulfopropanediol 3-dehydrogenase (EC 1.1.1.308)	hpsN_2 shim_14910	Shimia sp. SK013	425
A0A0N0E8T5	unreviewed	A0A0N0E8T5_9HYPH	Sulfopropanediol 3-dehydrogenase (EC 1.1.1.308) (2,3-dihydroxypropane-1-sulfonate 3-dehydrogenase (sulfolactate forming)) (DHPS 3-dehydrogenase (sulfolactate forming))	hpsN SU32_00090	Ahrensia marina	436
A0A0N0V4B5	unreviewed	A0A0N0V4B5_9RHOB	Sulfopropanediol 3-dehydrogenase (EC 1.1.1.308) (2,3-dihydroxypropane-1-sulfonate 3-dehydrogenase (sulfolactate forming)) (DHPS 3-dehydrogenase (sulfolactate forming))	hpsN_1 hpsN shim_04180	Shimia sp. SK013	435
A0A0N1BB18	unreviewed	A0A0N1BB18_9HYPH	Histidinol dehydrogenase (EC 1.1.1.23)	IP69_06110	Bosea sp. AAP35	437
A0A0P0M7Z0	unreviewed	A0A0P0M7Z0_9BURK	Sulfopropanediol 3-dehydrogenase (EC 1.1.1.308) (2,3-dihydroxypropane-1-sulfonate 3-dehydrogenase (sulfolactate forming)) (DHPS 3-dehydrogenase (sulfolactate forming))	hpsN L63ED372_00902	Limnohabitans sp. 63ED37-2	437
A0A0P1GY43	unreviewed	A0A0P1GY43_9RHOB	Sulfopropanediol 3-dehydrogenase (EC 1.1.1.308)	hpsN PH5382_01607	Phaeobacter sp. CECT 5382	427
A0A0P1GZ95	unreviewed	A0A0P1GZ95_9RHOB	Sulfopropanediol 3-dehydrogenase (EC 1.1.1.308) (2,3-dihydroxypropane-1-sulfonate 3-dehydrogenase (sulfolactate forming)) (DHPS 3-dehydrogenase (sulfolactate forming))	hpsN TRM7557_02731	Tritonibacter multivorans	435
A0A0P1I3U8	unreviewed	A0A0P1I3U8_9RHOB	Sulfopropanediol 3-dehydrogenase (EC 1.1.1.308) (2,3-dihydroxypropane-1-sulfonate 3-dehydrogenase (sulfolactate forming)) (DHPS 3-dehydrogenase (sulfolactate forming))	hpsN_1 hpsN PH7735_00931	Shimia thalassica	435
A0A0P1IVB2	unreviewed	A0A0P1IVB2_9RHOB	Sulfopropanediol 3-dehydrogenase (EC 1.1.1.308) (2,3-dihydroxypropane-1-sulfonate 3-dehydrogenase (sulfolactate forming)) (DHPS 3-dehydrogenase (sulfolactate forming))	hpsN TA5114_01769	Cognatishimia activa	435
A0A0Q6KGB2	unreviewed	A0A0Q6KGB2_9HYPH	Histidinol dehydrogenase (EC 1.1.1.23)	ASG72_02590	Bosea sp. Leaf344	437
A0A0Q7AGL0	unreviewed	A0A0Q7AGL0_9BURK	Histidinol dehydrogenase (EC 1.1.1.23)	ASC76_24190	Rhizobacter sp. Root404	439
A0A0Q7AIF0	unreviewed	A0A0Q7AIF0_9BURK	Sulfopropanediol 3-dehydrogenase (EC 1.1.1.308) (2,3-dihydroxypropane-1-sulfonate 3-dehydrogenase (sulfolactate forming)) (DHPS 3-dehydrogenase (sulfolactate forming))	hpsN ASC76_02370	Rhizobacter sp. Root404	437
A0A0Q9J660	unreviewed	A0A0Q9J660_9HYPH	Histidinol dehydrogenase (EC 1.1.1.23)	ASE66_04105	Bosea sp. Root483D1	437
A0A0U1NNI0	unreviewed	A0A0U1NNI0_9RHOB	Sulfopropanediol 3-dehydrogenase (EC 1.1.1.308) (2,3-dihydroxypropane-1-sulfonate 3-dehydrogenase (sulfolactate forming)) (DHPS 3-dehydrogenase (sulfolactate forming))	hpsN_2 hpsN NIG5292_02314	Nereida ignava	435
A0A0X3U7M9	unreviewed	A0A0X3U7M9_9RHOB	Histidinol dehydrogenase	AVO45_18175	Ruegeria marisrubri	425
A0A101JZ69	unreviewed	A0A101JZ69_9HYPH	Histidinol dehydrogenase (EC 1.1.1.23)	DK26_16575	Bosea sp. WAO	437
A0A166R8F4	unreviewed	A0A166R8F4_9RHOB	Sulfopropanediol 3-dehydrogenase (EC 1.1.1.308) (2,3-dihydroxypropane-1-sulfonate 3-dehydrogenase (sulfolactate forming)) (DHPS 3-dehydrogenase (sulfolactate forming))	hpsN A3721_08460	Sulfitobacter sp. HI0023	435
A0A177H7X0	unreviewed	A0A177H7X0_9RHOB	Sulfopropanediol 3-dehydrogenase (EC 1.1.1.308) (2,3-dihydroxypropane-1-sulfonate 3-dehydrogenase (sulfolactate forming)) (DHPS 3-dehydrogenase (sulfolactate forming))	hpsN_3 hpsN pfor_33c3129	Rhodobacteraceae bacterium SB2	435
A0A196QU39	unreviewed	A0A196QU39_9RHOB	Sulfopropanediol 3-dehydrogenase (EC 1.1.1.308) (2,3-dihydroxypropane-1-sulfonate 3-dehydrogenase (sulfolactate forming)) (DHPS 3-dehydrogenase (sulfolactate forming))	hpsN A8B74_16015	Sulfitobacter geojensis	436
A0A1B3NF99	unreviewed	A0A1B3NF99_9HYPH	Histidinol dehydrogenase (EC 1.1.1.23)	hisD BSY19_1289	Bosea sp. RAC05	437
A0A1C1YXP6	unreviewed	A0A1C1YXP6_9HYPH	Sulfopropanediol 3-dehydrogenase (EC 1.1.1.308) (2,3-dihydroxypropane-1-sulfonate 3-dehydrogenase (sulfolactate forming)) (DHPS 3-dehydrogenase (sulfolactate forming))	hpsN AWJ14_13445	Hoeflea olei	438
A0A1C2E772	unreviewed	A0A1C2E772_9HYPH	Histidinol dehydrogenase	QV13_05140	Mesorhizobium hungaricum	428
A0A1G4PBF6	unreviewed	A0A1G4PBF6_9HYPH	Histidinol dehydrogenase	SAMN05660859_0433	Ancylobacter rudongensis	436
A0A1G5RAL3	unreviewed	A0A1G5RAL3_9RHOB	Sulfopropanediol 3-dehydrogenase (EC 1.1.1.308) (2,3-dihydroxypropane-1-sulfonate 3-dehydrogenase (sulfolactate forming)) (DHPS 3-dehydrogenase (sulfolactate forming))	hpsN SAMN04488118_11135	Epibacterium ulvae	435
A0A1G8WI68	unreviewed	A0A1G8WI68_9RHOB	Sulfopropanediol 3-dehydrogenase	SAMN04488026_10248	Aliiruegeria lutimaris	418
A0A1H2FAC4	unreviewed	A0A1H2FAC4_9HYPH	Sulfopropanediol 3-dehydrogenase (EC 1.1.1.308) (2,3-dihydroxypropane-1-sulfonate 3-dehydrogenase (sulfolactate forming)) (DHPS 3-dehydrogenase (sulfolactate forming))	hpsN SAMN05428979_1287	Stappia sp. ES.058	435
A0A1H3NFF4	unreviewed	A0A1H3NFF4_9RHOB	Sulfopropanediol 3-dehydrogenase (EC 1.1.1.308) (2,3-dihydroxypropane-1-sulfonate 3-dehydrogenase (sulfolactate forming)) (DHPS 3-dehydrogenase (sulfolactate forming))	hpsN SAMN05444486_1089	Lentibacter algarum	435
A0A1H4EEK2	unreviewed	A0A1H4EEK2_9RHOB	Sulfopropanediol 3-dehydrogenase (EC 1.1.1.308) (2,3-dihydroxypropane-1-sulfonate 3-dehydrogenase (sulfolactate forming)) (DHPS 3-dehydrogenase (sulfolactate forming))	hpsN SAMN05444370_11390	Rubrimonas cliftonensis	435
A0A1H6YVH3	unreviewed	A0A1H6YVH3_9BURK	Sulfopropanediol 3-dehydrogenase (EC 1.1.1.308) (2,3-dihydroxypropane-1-sulfonate 3-dehydrogenase (sulfolactate forming)) (DHPS 3-dehydrogenase (sulfolactate forming))	hpsN SAMN05192539_1010144	Paraburkholderia diazotrophica	437
A0A1H7ME26	unreviewed	A0A1H7ME26_9RHOB	Sulfopropanediol 3-dehydrogenase	SAMN04488526_1888	Jannaschia helgolandensis	425
A0A1H7P794	unreviewed	A0A1H7P794_9RHOB	Sulfopropanediol 3-dehydrogenase (EC 1.1.1.308) (2,3-dihydroxypropane-1-sulfonate 3-dehydrogenase (sulfolactate forming)) (DHPS 3-dehydrogenase (sulfolactate forming))	hpsN SAMN04488526_2439	Jannaschia helgolandensis	435
A0A1H7R6P3	unreviewed	A0A1H7R6P3_9RHOB	Sulfopropanediol 3-dehydrogenase (EC 1.1.1.308) (2,3-dihydroxypropane-1-sulfonate 3-dehydrogenase (sulfolactate forming)) (DHPS 3-dehydrogenase (sulfolactate forming))	hpsN SAMN05443999_10673	Roseovarius azorensis	435
A0A1H8MMZ6	unreviewed	A0A1H8MMZ6_9RHOB	Sulfopropanediol 3-dehydrogenase	SAMN04489859_104230	Paracoccus alcaliphilus	437
A0A1I0JJE7	unreviewed	A0A1I0JJE7_9RHOB	Sulfopropanediol 3-dehydrogenase (EC 1.1.1.308) (2,3-dihydroxypropane-1-sulfonate 3-dehydrogenase (sulfolactate forming)) (DHPS 3-dehydrogenase (sulfolactate forming))	hpsN SAMN04489858_1287	Paracoccus homiensis	438
A0A1I0RZL8	unreviewed	A0A1I0RZL8_9RHOB	Sulfopropanediol 3-dehydrogenase (EC 1.1.1.308) (2,3-dihydroxypropane-1-sulfonate 3-dehydrogenase (sulfolactate forming)) (DHPS 3-dehydrogenase (sulfolactate forming))	hpsN SAMN04488515_3526	Cognatiyoonia koreensis	435
A0A1I2BFA3	unreviewed	A0A1I2BFA3_9RHOB	Sulfopropanediol 3-dehydrogenase	SAMN04488523_10866	Sulfitobacter brevis	425
A0A1I3IID7	unreviewed	A0A1I3IID7_9RHOB	Sulfopropanediol 3-dehydrogenase	SAMN04488095_0980	Jannaschia pohangensis	425
A0A1I6MLZ5	unreviewed	A0A1I6MLZ5_9RHOB	Sulfopropanediol 3-dehydrogenase (EC 1.1.1.308) (2,3-dihydroxypropane-1-sulfonate 3-dehydrogenase (sulfolactate forming)) (DHPS 3-dehydrogenase (sulfolactate forming))	hpsN SAMN05444714_2025	Yoonia litorea	435
A0A1I6PNM5	unreviewed	A0A1I6PNM5_9RHOB	Sulfopropanediol 3-dehydrogenase	SAMN04488040_0262	Sulfitobacter marinus	425
A0A1L9P121	unreviewed	A0A1L9P121_9RHOB	Sulfopropanediol 3-dehydrogenase (EC 1.1.1.308) (2,3-dihydroxypropane-1-sulfonate 3-dehydrogenase (sulfolactate forming)) (DHPS 3-dehydrogenase (sulfolactate forming))	hpsN_1 hpsN PFRI_06440	Planktotalea frisia	435
A0A1M4THF2	unreviewed	A0A1M4THF2_9GAMM	Sulfopropanediol 3-dehydrogenase (EC 1.1.1.308) (2,3-dihydroxypropane-1-sulfonate 3-dehydrogenase (sulfolactate forming)) (DHPS 3-dehydrogenase (sulfolactate forming))	hpsN SAMN02745148_00452	Halomonas ilicicola DSM 19980	437
A0A1M4X1T6	unreviewed	A0A1M4X1T6_9RHOB	Sulfopropanediol 3-dehydrogenase	SAMN05444339_102313	Loktanella atrilutea	438
A0A1M4YN22	unreviewed	A0A1M4YN22_9RHOB	Sulfopropanediol 3-dehydrogenase (EC 1.1.1.308) (2,3-dihydroxypropane-1-sulfonate 3-dehydrogenase (sulfolactate forming)) (DHPS 3-dehydrogenase (sulfolactate forming))	hpsN SAMN05444279_11639	Ruegeria intermedia	435
A0A1M5JYV9	unreviewed	A0A1M5JYV9_9RHOB	Sulfopropanediol 3-dehydrogenase (EC 1.1.1.308) (2,3-dihydroxypropane-1-sulfonate 3-dehydrogenase (sulfolactate forming)) (DHPS 3-dehydrogenase (sulfolactate forming))	hpsN SAMN04488044_0816	Cognatishimia maritima	435
A0A1M6LRT0	unreviewed	A0A1M6LRT0_9RHOB	Sulfopropanediol 3-dehydrogenase (EC 1.1.1.308) (2,3-dihydroxypropane-1-sulfonate 3-dehydrogenase (sulfolactate forming)) (DHPS 3-dehydrogenase (sulfolactate forming))	hpsN SAMN04488012_11731	Maribius salinus	435
A0A1M6Z6J1	unreviewed	A0A1M6Z6J1_9RHOB	Sulfopropanediol 3-dehydrogenase (EC 1.1.1.308) (2,3-dihydroxypropane-1-sulfonate 3-dehydrogenase (sulfolactate forming)) (DHPS 3-dehydrogenase (sulfolactate forming))	hpsN SAMN05444414_10915	Roseovarius marisflavi	435
A0A1M7KBK4	unreviewed	A0A1M7KBK4_9RHOB	Sulfopropanediol 3-dehydrogenase (EC 1.1.1.308) (2,3-dihydroxypropane-1-sulfonate 3-dehydrogenase (sulfolactate forming)) (DHPS 3-dehydrogenase (sulfolactate forming))	hpsN SAMN05443432_11064	Roseovarius litoreus	435
A0A1R3X3X6	unreviewed	A0A1R3X3X6_9RHOB	Sulfopropanediol 3-dehydrogenase (EC 1.1.1.308) (2,3-dihydroxypropane-1-sulfonate 3-dehydrogenase (sulfolactate forming)) (DHPS 3-dehydrogenase (sulfolactate forming))	hpsN SAMN05421665_2071	Yoonia rosea	435
A0A1T4VCI9	unreviewed	A0A1T4VCI9_9GAMM	Sulfopropanediol 3-dehydrogenase (EC 1.1.1.308) (2,3-dihydroxypropane-1-sulfonate 3-dehydrogenase (sulfolactate forming)) (DHPS 3-dehydrogenase (sulfolactate forming))	hpsN SAMN02745132_03656	Enterovibrio nigricans DSM 22720	434
A0A1U7DH94	unreviewed	A0A1U7DH94_9RHOB	Sulfopropanediol 3-dehydrogenase (EC 1.1.1.308) (2,3-dihydroxypropane-1-sulfonate 3-dehydrogenase (sulfolactate forming)) (DHPS 3-dehydrogenase (sulfolactate forming))	hpsN BV394_06130 CLV77_0560	Brevirhabdus pacifica	435
A0A1U9Z7C6	unreviewed	A0A1U9Z7C6_9HYPH	Sulfopropanediol 3-dehydrogenase (EC 1.1.1.308) (2,3-dihydroxypropane-1-sulfonate 3-dehydrogenase (sulfolactate forming)) (DHPS 3-dehydrogenase (sulfolactate forming))	hpsN_1 hpsN Mame_04313	Martelella mediterranea DSM 17316	435
A0A1V0GVB6	unreviewed	A0A1V0GVB6_9RHOB	Histidinol dehydrogenase	hisD A6J80_16410	Paracoccus yeei	437
A0A1V0RPX9	unreviewed	A0A1V0RPX9_9RHOB	Sulfopropanediol 3-dehydrogenase (EC 1.1.1.308) (2,3-dihydroxypropane-1-sulfonate 3-dehydrogenase (sulfolactate forming)) (DHPS 3-dehydrogenase (sulfolactate forming))	hpsN ROSMUCSMR3_02361	Roseovarius mucosus	435
A0A1W2EPQ4	unreviewed	A0A1W2EPQ4_9HYPH	Sulfopropanediol 3-dehydrogenase	SAMN06297251_1303	Fulvimarina manganoxydans	435
A0A1X4NND4	unreviewed	A0A1X4NND4_9RHOB	Sulfopropanediol 3-dehydrogenase (EC 1.1.1.308) (2,3-dihydroxypropane-1-sulfonate 3-dehydrogenase (sulfolactate forming)) (DHPS 3-dehydrogenase (sulfolactate forming))	hpsN MGEO_05345	Marivita geojedonensis	435
A0A1X6YV20	unreviewed	A0A1X6YV20_9RHOB	Sulfopropanediol 3-dehydrogenase (EC 1.1.1.308) (2,3-dihydroxypropane-1-sulfonate 3-dehydrogenase (sulfolactate forming)) (DHPS 3-dehydrogenase (sulfolactate forming))	hpsN_2 hpsN ROA7450_01405	Roseovarius albus	435
A0A1X6ZRQ6	unreviewed	A0A1X6ZRQ6_9RHOB	Sulfopropanediol 3-dehydrogenase (EC 1.1.1.308) (2,3-dihydroxypropane-1-sulfonate 3-dehydrogenase (sulfolactate forming)) (DHPS 3-dehydrogenase (sulfolactate forming))	hpsN_2 hpsN ROH8110_03324	Roseovarius halotolerans	435
A0A1X7BP74	unreviewed	A0A1X7BP74_9RHOB	Sulfopropanediol 3-dehydrogenase (EC 1.1.1.308) (2,3-dihydroxypropane-1-sulfonate 3-dehydrogenase (sulfolactate forming)) (DHPS 3-dehydrogenase (sulfolactate forming))	hpsN_2 hpsN ROA7745_01245	Roseovarius aestuarii	435
A0A1Y5RRA6	unreviewed	A0A1Y5RRA6_9RHOB	Sulfopropanediol 3-dehydrogenase (EC 1.1.1.308) (2,3-dihydroxypropane-1-sulfonate 3-dehydrogenase (sulfolactate forming)) (DHPS 3-dehydrogenase (sulfolactate forming))	hpsN_1 hpsN PEL8287_01043	Roseovarius litorisediminis	435
A0A1Y5T4U4	unreviewed	A0A1Y5T4U4_9RHOB	Sulfopropanediol 3-dehydrogenase (EC 1.1.1.308) (2,3-dihydroxypropane-1-sulfonate 3-dehydrogenase (sulfolactate forming)) (DHPS 3-dehydrogenase (sulfolactate forming))	hpsN_2 hpsN TRL7639_02751	Falsiruegeria litorea R37	435
A0A1Y5TB28	unreviewed	A0A1Y5TB28_9RHOB	Sulfopropanediol 3-dehydrogenase (EC 1.1.1.308) (2,3-dihydroxypropane-1-sulfonate 3-dehydrogenase (sulfolactate forming)) (DHPS 3-dehydrogenase (sulfolactate forming))	hpsN_2 hpsN PSA7680_03141	Pseudoruegeria aquimaris	435
A0A225MKE3	unreviewed	A0A225MKE3_9BURK	Histidinol dehydrogenase	hisD CEY11_11000	Candidimonas nitroreducens	433
A0A238IZR3	unreviewed	A0A238IZR3_9RHOB	Sulfopropanediol 3-dehydrogenase (EC 1.1.1.308) (2,3-dihydroxypropane-1-sulfonate 3-dehydrogenase (sulfolactate forming)) (DHPS 3-dehydrogenase (sulfolactate forming))	hpsN_2 hpsN BOA8489_01990	Boseongicola aestuarii	435
A0A238JHY2	unreviewed	A0A238JHY2_9RHOB	Sulfopropanediol 3-dehydrogenase (EC 1.1.1.308) (2,3-dihydroxypropane-1-sulfonate 3-dehydrogenase (sulfolactate forming)) (DHPS 3-dehydrogenase (sulfolactate forming))	hpsN_1 hpsN TRP8649_03699	Pelagimonas phthalicica	435
A0A238JZ25	unreviewed	A0A238JZ25_9RHOB	Sulfopropanediol 3-dehydrogenase (EC 1.1.1.308) (2,3-dihydroxypropane-1-sulfonate 3-dehydrogenase (sulfolactate forming)) (DHPS 3-dehydrogenase (sulfolactate forming))	hpsN_1 hpsN MAA8898_00680	Maliponia aquimaris	435
A0A238K0J1	unreviewed	A0A238K0J1_9RHOB	Sulfopropanediol 3-dehydrogenase (EC 1.1.1.308) (2,3-dihydroxypropane-1-sulfonate 3-dehydrogenase (sulfolactate forming)) (DHPS 3-dehydrogenase (sulfolactate forming))	hpsN_1 hpsN PEV8663_00654	Pelagimonas varians	435
A0A238KXZ5	unreviewed	A0A238KXZ5_9RHOB	Sulfopropanediol 3-dehydrogenase (EC 1.1.1.308) (2,3-dihydroxypropane-1-sulfonate 3-dehydrogenase (sulfolactate forming)) (DHPS 3-dehydrogenase (sulfolactate forming))	hpsN_1 hpsN RUA8715_02979	Ruegeria arenilitoris	435
A0A238LAM7	unreviewed	A0A238LAM7_9RHOB	Sulfopropanediol 3-dehydrogenase (EC 1.1.1.308)	hpsN_2 LOM8899_00816	Flavimaricola marinus	431
A0A239CB23	unreviewed	A0A239CB23_9RHOB	Sulfopropanediol 3-dehydrogenase	SAMN05421757_101192	Tropicimonas sediminicola	424
A0A239PUA4	unreviewed	A0A239PUA4_9RHOB	Sulfopropanediol 3-dehydrogenase (EC 1.1.1.308) (2,3-dihydroxypropane-1-sulfonate 3-dehydrogenase (sulfolactate forming)) (DHPS 3-dehydrogenase (sulfolactate forming))	hpsN SAMN05444959_10559	Paracoccus seriniphilus	438
A0A239Q1U9	unreviewed	A0A239Q1U9_9RHOB	Sulfopropanediol 3-dehydrogenase	SAMN05444959_11767	Paracoccus seriniphilus	427
A0A257GSG2	unreviewed	A0A257GSG2_9RHOB	Sulfopropanediol 3-dehydrogenase (EC 1.1.1.308) (2,3-dihydroxypropane-1-sulfonate 3-dehydrogenase (sulfolactate forming)) (DHPS 3-dehydrogenase (sulfolactate forming))	hisD hpsN CFE33_04530	Pseudorhodobacter sp. PARRP1	436
A0A285PM26	unreviewed	A0A285PM26_9HYPH	Sulfopropanediol 3-dehydrogenase (EC 1.1.1.308) (2,3-dihydroxypropane-1-sulfonate 3-dehydrogenase (sulfolactate forming)) (DHPS 3-dehydrogenase (sulfolactate forming))	hpsN SAMN06265368_4303	Cohaesibacter gelatinilyticus	435
A0A286ID79	unreviewed	A0A286ID79_9HYPH	Sulfopropanediol 3-dehydrogenase (EC 1.1.1.308) (2,3-dihydroxypropane-1-sulfonate 3-dehydrogenase (sulfolactate forming)) (DHPS 3-dehydrogenase (sulfolactate forming))	hpsN SAMN05877838_2933	Hoeflea halophila	438
A0A291P4P8	unreviewed	A0A291P4P8_9GAMM	Sulfopropanediol 3-dehydrogenase (EC 1.1.1.308) (2,3-dihydroxypropane-1-sulfonate 3-dehydrogenase (sulfolactate forming)) (DHPS 3-dehydrogenase (sulfolactate forming))	hpsN1 hpsN BEI_0845	Halomonas beimenensis	437
A0A2G1QNG6	unreviewed	A0A2G1QNG6_9HYPH	Sulfopropanediol 3-dehydrogenase (EC 1.1.1.308) (2,3-dihydroxypropane-1-sulfonate 3-dehydrogenase (sulfolactate forming)) (DHPS 3-dehydrogenase (sulfolactate forming))	hisD hpsN CSC94_10760	Zhengella mangrovi	435
A0A2G5K5A1	unreviewed	A0A2G5K5A1_9RHOB	Histidinol dehydrogenase	BFP76_05800	Amylibacter kogurei	454
A0A2K8KJC9	unreviewed	A0A2K8KJC9_9RHOB	Sulfopropanediol 3-dehydrogenase (EC 1.1.1.308) (2,3-dihydroxypropane-1-sulfonate 3-dehydrogenase (sulfolactate forming)) (DHPS 3-dehydrogenase (sulfolactate forming))	hisD hpsN BG454_15370	Rhodobaca barguzinensis	439
A0A2L1GMU3	unreviewed	A0A2L1GMU3_9BACT	Histidinol dehydrogenase	CAY53_05305	Desulfobulbus oralis	437
A0A2N7UQU8	unreviewed	A0A2N7UQU8_9GAMM	Sulfopropanediol 3-dehydrogenase (EC 1.1.1.308) (2,3-dihydroxypropane-1-sulfonate 3-dehydrogenase (sulfolactate forming)) (DHPS 3-dehydrogenase (sulfolactate forming))	hisD hpsN C1H70_00720	Halomonas urumqiensis	437
A0A2P8F8R9	unreviewed	A0A2P8F8R9_9RHOB	Sulfopropanediol 3-dehydrogenase (EC 1.1.1.308) (2,3-dihydroxypropane-1-sulfonate 3-dehydrogenase (sulfolactate forming)) (DHPS 3-dehydrogenase (sulfolactate forming))	hpsN CLV88_11238	Shimia abyssi	435
A0A2P8FHB0	unreviewed	A0A2P8FHB0_9RHOB	Sulfopropanediol 3-dehydrogenase (EC 1.1.1.308) (2,3-dihydroxypropane-1-sulfonate 3-dehydrogenase (sulfolactate forming)) (DHPS 3-dehydrogenase (sulfolactate forming))	hpsN CLV88_102233	Shimia abyssi	442
A0A2R8A8E0	unreviewed	A0A2R8A8E0_9RHOB	Sulfopropanediol 3-dehydrogenase (EC 1.1.1.308) (2,3-dihydroxypropane-1-sulfonate 3-dehydrogenase (sulfolactate forming)) (DHPS 3-dehydrogenase (sulfolactate forming))	hpsN_1 hpsN POI8812_00586	Pontivivens insulae	435
A0A2R8A938	unreviewed	A0A2R8A938_9RHOB	Sulfopropanediol 3-dehydrogenase (EC 1.1.1.308)	hpsN_2 POI8812_01050	Pontivivens insulae	425
A0A2R8AMF3	unreviewed	A0A2R8AMF3_9RHOB	Sulfopropanediol 3-dehydrogenase (EC 1.1.1.308) (2,3-dihydroxypropane-1-sulfonate 3-dehydrogenase (sulfolactate forming)) (DHPS 3-dehydrogenase (sulfolactate forming))	hpsN_2 hpsN ALP8811_02239	Aliiroseovarius pelagivivens	435
A0A2R8AMZ1	unreviewed	A0A2R8AMZ1_9RHOB	Sulfopropanediol 3-dehydrogenase (EC 1.1.1.308)	hpsN_3 ALP8811_02260	Aliiroseovarius pelagivivens	422
A0A2R8B6N9	unreviewed	A0A2R8B6N9_9RHOB	Sulfopropanediol 3-dehydrogenase (EC 1.1.1.308)	hpsN_2 DEA8626_01844	Defluviimonas aquaemixtae	425
A0A2R8B863	unreviewed	A0A2R8B863_9RHOB	Sulfopropanediol 3-dehydrogenase (EC 1.1.1.308) (2,3-dihydroxypropane-1-sulfonate 3-dehydrogenase (sulfolactate forming)) (DHPS 3-dehydrogenase (sulfolactate forming))	hpsN_3 hpsN DEA8626_02362	Defluviimonas aquaemixtae	435
A0A2R8BBD4	unreviewed	A0A2R8BBD4_9RHOB	Sulfopropanediol 3-dehydrogenase (EC 1.1.1.308) (2,3-dihydroxypropane-1-sulfonate 3-dehydrogenase (sulfolactate forming)) (DHPS 3-dehydrogenase (sulfolactate forming))	hpsN_1 hpsN ASD8599_01104	Ascidiaceihabitans donghaensis	435
A0A2R8BP73	unreviewed	A0A2R8BP73_9RHOB	Sulfopropanediol 3-dehydrogenase (EC 1.1.1.308) (2,3-dihydroxypropane-1-sulfonate 3-dehydrogenase (sulfolactate forming)) (DHPS 3-dehydrogenase (sulfolactate forming))	hpsN_3 hpsN ASD8599_03862	Ascidiaceihabitans donghaensis	435
A0A2S0MUV3	unreviewed	A0A2S0MUV3_9RHOB	Sulfopropanediol 3-dehydrogenase (EC 1.1.1.308) (2,3-dihydroxypropane-1-sulfonate 3-dehydrogenase (sulfolactate forming)) (DHPS 3-dehydrogenase (sulfolactate forming))	hisD hpsN C6Y53_06700	Pukyongiella litopenaei	435
A0A2S0UH73	unreviewed	A0A2S0UH73_9RHOB	Histidinol dehydrogenase	hisD HYN69_00370	Gemmobacter aquarius	430
A0A2S5JHW6	unreviewed	A0A2S5JHW6_9RHOB	Sulfopropanediol 3-dehydrogenase (EC 1.1.1.308) (2,3-dihydroxypropane-1-sulfonate 3-dehydrogenase (sulfolactate forming)) (DHPS 3-dehydrogenase (sulfolactate forming))	hpsN LV82_01681	Albidovulum inexpectatum	435
A0A2T6BJX1	unreviewed	A0A2T6BJX1_9RHOB	Sulfopropanediol 3-dehydrogenase (EC 1.1.1.308) (2,3-dihydroxypropane-1-sulfonate 3-dehydrogenase (sulfolactate forming)) (DHPS 3-dehydrogenase (sulfolactate forming))	hpsN C8N43_0987	Litoreibacter ponti	435
A0A2T6KHF1	unreviewed	A0A2T6KHF1_9RHOB	Sulfopropanediol 3-dehydrogenase (EC 1.1.1.308) (2,3-dihydroxypropane-1-sulfonate 3-dehydrogenase (sulfolactate forming)) (DHPS 3-dehydrogenase (sulfolactate forming))	hpsN C8N45_105169	Yoonia sediminilitoris	435
A0A2T7G0J0	unreviewed	A0A2T7G0J0_9RHOB	Histidinol dehydrogenase	hisD DC363_00020	Thalassorhabdomicrobium marinisediminis	435
A0A2U2CRG8	unreviewed	A0A2U2CRG8_9RHOB	Sulfopropanediol 3-dehydrogenase (EC 1.1.1.308) (2,3-dihydroxypropane-1-sulfonate 3-dehydrogenase (sulfolactate forming)) (DHPS 3-dehydrogenase (sulfolactate forming))	hisD hpsN DD563_14955	Pelagicola sp. LXJ1103	435
A0A2U2N631	unreviewed	A0A2U2N631_9GAMM	Histidinol dehydrogenase	hisD DEM34_04185	Spiribacter sp. E85	434
A0A2U8GP18	unreviewed	A0A2U8GP18_9RHOO	Sulfopropanediol 3-dehydrogenase (EC 1.1.1.308) (2,3-dihydroxypropane-1-sulfonate 3-dehydrogenase (sulfolactate forming)) (DHPS 3-dehydrogenase (sulfolactate forming))	hisD hpsN CEW83_08425	Parazoarcus communis	436
A0A2V1P2N2	unreviewed	A0A2V1P2N2_9RHOB	Histidinol dehydrogenase	hisD DFK10_09650	Salibaculum griseiflavum	429
A0A2Y9C0P1	unreviewed	A0A2Y9C0P1_9RHOB	Sulfopropanediol 3-dehydrogenase (EC 1.1.1.308) (2,3-dihydroxypropane-1-sulfonate 3-dehydrogenase (sulfolactate forming)) (DHPS 3-dehydrogenase (sulfolactate forming))	hpsN BCF38_1057 SAMN05421539_1057	Jannaschia seohaensis	435
A0A2Z2NUL7	unreviewed	A0A2Z2NUL7_9GAMM	Sulfopropanediol 3-dehydrogenase (EC 1.1.1.308) (2,3-dihydroxypropane-1-sulfonate 3-dehydrogenase (sulfolactate forming)) (DHPS 3-dehydrogenase (sulfolactate forming))	hpsN_2 hpsN IMCC3135_26035	Granulosicoccus antarcticus IMCC3135	433
A0A317C2I5	unreviewed	A0A317C2I5_9GAMM	Histidinol dehydrogenase	hisD DKW60_18790	Leucothrix pacifica	434
A0A317F5R5	unreviewed	A0A317F5R5_9PROT	Histidinol dehydrogenase	hisD DFH01_23485	Falsiroseomonas bella	437
A0A317PJE6	unreviewed	A0A317PJE6_9HYPH	Sulfopropanediol 3-dehydrogenase (EC 1.1.1.308) (2,3-dihydroxypropane-1-sulfonate 3-dehydrogenase (sulfolactate forming)) (DHPS 3-dehydrogenase (sulfolactate forming))	hpsN DFR52_103207	Hoeflea marina	437
A0A318L753		A0A318L753_9GAMM	deleted
A0A345Q9K3	unreviewed	A0A345Q9K3_9RHOB	Sulfopropanediol 3-dehydrogenase (EC 1.1.1.308) (2,3-dihydroxypropane-1-sulfonate 3-dehydrogenase (sulfolactate forming)) (DHPS 3-dehydrogenase (sulfolactate forming))	hisD hpsN C1J02_08645	Sulfitobacter sp. SK011	435
A0A345QMX6	unreviewed	A0A345QMX6_9RHOB	Sulfopropanediol 3-dehydrogenase (EC 1.1.1.308) (2,3-dihydroxypropane-1-sulfonate 3-dehydrogenase (sulfolactate forming)) (DHPS 3-dehydrogenase (sulfolactate forming))	hisD hpsN C1J03_11915	Sulfitobacter sp. SK012	435
A0A345R9L5	unreviewed	A0A345R9L5_9RHOB	Sulfopropanediol 3-dehydrogenase (EC 1.1.1.308) (2,3-dihydroxypropane-1-sulfonate 3-dehydrogenase (sulfolactate forming)) (DHPS 3-dehydrogenase (sulfolactate forming))	hisD hpsN C1J05_06910	Sulfitobacter sp. JL08	435
A0A368YFL3	unreviewed	A0A368YFL3_9RHOB	Sulfopropanediol 3-dehydrogenase	DFP89_1389	Paracoccus lutimaris	438
A0A369QRX5	unreviewed	A0A369QRX5_9RHOB	Histidinol dehydrogenase (EC 1.1.1.23)	hisD DLJ49_16690	Rhodovulum sp. 12E13	427
A0A386TF60	unreviewed	A0A386TF60_9RHOB	Histidinol dehydrogenase	B5M07_10355	Sulfitobacter sp. D7	425
A0A397PFL8	unreviewed	A0A397PFL8_9HYPH	Sulfopropanediol 3-dehydrogenase (EC 1.1.1.308) (2,3-dihydroxypropane-1-sulfonate 3-dehydrogenase (sulfolactate forming)) (DHPS 3-dehydrogenase (sulfolactate forming))	hpsN BXY53_2635	Dichotomicrobium thermohalophilum	437
A0A3B0MA36	unreviewed	A0A3B0MA36_9RHOB	Sulfopropanediol 3-dehydrogenase (EC 1.1.1.308)	hpsN ROE7235_02494	Roseibaca ekhonensis	438
A0A3N9U801	unreviewed	A0A3N9U801_9GAMM	Sulfopropanediol 3-dehydrogenase (EC 1.1.1.308) (2,3-dihydroxypropane-1-sulfonate 3-dehydrogenase (sulfolactate forming)) (DHPS 3-dehydrogenase (sulfolactate forming))	hisD hpsN EBB56_01905	Halomonas sp. YLB-10	437
A0A3P5X521	unreviewed	A0A3P5X521_9RHOB	Sulfopropanediol 3-dehydrogenase (EC 1.1.1.308) (2,3-dihydroxypropane-1-sulfonate 3-dehydrogenase (sulfolactate forming)) (DHPS 3-dehydrogenase (sulfolactate forming))	hpsN PARPLA_02037	Rhodobacteraceae bacterium THAF1	435
A0A3P5XQQ2	unreviewed	A0A3P5XQQ2_9RHOB	Sulfopropanediol 3-dehydrogenase (EC 1.1.1.308)	hpsN XINFAN_02501	Pseudogemmobacter humi	432
A0A3S2X3G8	unreviewed	A0A3S2X3G8_9BURK	Sulfopropanediol 3-dehydrogenase (EC 1.1.1.308) (2,3-dihydroxypropane-1-sulfonate 3-dehydrogenase (sulfolactate forming)) (DHPS 3-dehydrogenase (sulfolactate forming))	hisD hpsN ENE75_02665	Rubrivivax albus	437
A0A3S8U8S5	unreviewed	A0A3S8U8S5_9RHOB	Histidinol dehydrogenase (EC 1.1.1.23)	hisD EI545_14725	Tabrizicola piscis	436
A0A418SSV9	unreviewed	A0A418SSV9_9RHOB	Sulfopropanediol 3-dehydrogenase (EC 1.1.1.308) (2,3-dihydroxypropane-1-sulfonate 3-dehydrogenase (sulfolactate forming)) (DHPS 3-dehydrogenase (sulfolactate forming))	hisD hpsN D3P04_13655	Paracoccus onubensis	435
A0A419ACN7	unreviewed	A0A419ACN7_9RHOB	Sulfopropanediol 3-dehydrogenase (EC 1.1.1.308) (2,3-dihydroxypropane-1-sulfonate 3-dehydrogenase (sulfolactate forming)) (DHPS 3-dehydrogenase (sulfolactate forming))	hisD hpsN D3P05_00270	Paracoccus siganidrum	435
A0A420DND5	unreviewed	A0A420DND5_9RHOB	Sulfopropanediol 3-dehydrogenase (EC 1.1.1.308) (2,3-dihydroxypropane-1-sulfonate 3-dehydrogenase (sulfolactate forming)) (DHPS 3-dehydrogenase (sulfolactate forming))	hpsN C8N30_0336	Sulfitobacter guttiformis	435
A0A4D7QLC7	unreviewed	A0A4D7QLC7_9HYPH	Histidinol dehydrogenase (EC 1.1.1.23)	hisD E8L99_17210	Phreatobacter sp. NMCR1094	437
A0A4Q2AAM4	unreviewed	A0A4Q2AAM4_9RHOB	Sulfopropanediol 3-dehydrogenase (EC 1.1.1.308) (2,3-dihydroxypropane-1-sulfonate 3-dehydrogenase (sulfolactate forming)) (DHPS 3-dehydrogenase (sulfolactate forming))	hisD hpsN C6W92_04250	Roseovarius sp. A46	435
A0A4Q3YS44	unreviewed	A0A4Q3YS44_9RHOB	Histidinol dehydrogenase (EC 1.1.1.23)	hisD EU805_16130	Salipiger sp. IMCC34102	441
A0A4R0PB94	unreviewed	A0A4R0PB94_9HYPH	Sulfopropanediol 3-dehydrogenase (EC 1.1.1.308) (2,3-dihydroxypropane-1-sulfonate 3-dehydrogenase (sulfolactate forming)) (DHPS 3-dehydrogenase (sulfolactate forming))	hisD hpsN E0D97_14260	Oricola cellulosilytica	435
A0A4R1EZ02	unreviewed	A0A4R1EZ02_9GAMM	Sulfopropanediol 3-dehydrogenase	EV695_3125	Cocleimonas flava	440
A0A4R3JDF3	unreviewed	A0A4R3JDF3_9RHOB	Sulfopropanediol 3-dehydrogenase	EDD52_106110	Primorskyibacter sedentarius	425
A0A4R3JFG6	unreviewed	A0A4R3JFG6_9RHOB	Sulfopropanediol 3-dehydrogenase (EC 1.1.1.308) (2,3-dihydroxypropane-1-sulfonate 3-dehydrogenase (sulfolactate forming)) (DHPS 3-dehydrogenase (sulfolactate forming))	hpsN EDD52_105128	Primorskyibacter sedentarius	435
A0A4R6A6V1	unreviewed	A0A4R6A6V1_9RHOB	Histidinol dehydrogenase (EC 1.1.1.23)	hisD E2L08_13285	Palleronia sediminis	439
A0A4U8V6W6	unreviewed	A0A4U8V6W6_9BURK	Sulfopropanediol 3-dehydrogenase (EC 1.1.1.308) (2,3-dihydroxypropane-1-sulfonate 3-dehydrogenase (sulfolactate forming)) (DHPS 3-dehydrogenase (sulfolactate forming))	hisD hpsN MW7_008600	Burkholderiaceae bacterium PBA	437
A0A4V1V353	unreviewed	A0A4V1V353_9RHOB	Sulfopropanediol 3-dehydrogenase (EC 1.1.1.308) (2,3-dihydroxypropane-1-sulfonate 3-dehydrogenase (sulfolactate forming)) (DHPS 3-dehydrogenase (sulfolactate forming))	hisD hpsN EU803_03180	Loktanella sp. IMCC34160	436
A0A506TZV1	unreviewed	A0A506TZV1_9HYPH	Histidinol dehydrogenase (EC 1.1.1.23)	hisD FJU11_15415	Pararhizobium mangrovi	437
A0A506U4D6	unreviewed	A0A506U4D6_9HYPH	Sulfopropanediol 3-dehydrogenase (EC 1.1.1.308) (2,3-dihydroxypropane-1-sulfonate 3-dehydrogenase (sulfolactate forming)) (DHPS 3-dehydrogenase (sulfolactate forming))	hisD hpsN FJU08_21725	Martelella alba	435
A0A509EBS9	unreviewed	A0A509EBS9_9HYPH	Sulfopropanediol 3-dehydrogenase (EC 1.1.1.308) (2,3-dihydroxypropane-1-sulfonate 3-dehydrogenase (sulfolactate forming)) (DHPS 3-dehydrogenase (sulfolactate forming))	hpsN MET9862_02344	Methylobacterium symbioticum	437
A0A541BYJ8	unreviewed	A0A541BYJ8_9PROT	Histidinol dehydrogenase (EC 1.1.1.23)	hisD FK498_12720	Elioraea sp. Yellowstone	437
A0A545U3C7	unreviewed	A0A545U3C7_9PROT	Histidinol dehydrogenase (EC 1.1.1.23)	hisD FKG95_04685	Denitrobaculum tricleocarpae	423
A0A547Q021	unreviewed	A0A547Q021_9RHOB	Sulfopropanediol 3-dehydrogenase (EC 1.1.1.308) (2,3-dihydroxypropane-1-sulfonate 3-dehydrogenase (sulfolactate forming)) (DHPS 3-dehydrogenase (sulfolactate forming))	hisD hpsN FEV53_10580	Paenimaribius caenipelagi	435
A0A562TG36	unreviewed	A0A562TG36_9HYPH	Sulfopropanediol 3-dehydrogenase (EC 1.1.1.308) (2,3-dihydroxypropane-1-sulfonate 3-dehydrogenase (sulfolactate forming)) (DHPS 3-dehydrogenase (sulfolactate forming))	hpsN JM93_00061	Roseibium hamelinense	437
A0A5B9ETN1	unreviewed	A0A5B9ETN1_9RHOB	Histidinol dehydrogenase (EC 1.1.1.23)	hisD FTO60_13760	Octadecabacter sp. SW4	432
A0A5D0S5E9	unreviewed	A0A5D0S5E9_9RHOB	Sulfopropanediol 3-dehydrogenase (EC 1.1.1.308) (2,3-dihydroxypropane-1-sulfonate 3-dehydrogenase (sulfolactate forming)) (DHPS 3-dehydrogenase (sulfolactate forming))	hisD hpsN FQ320_08925	Oceaniovalibus sp. ACAM 378	435
A0A5K7YM20	unreviewed	A0A5K7YM20_9BACT	Histidinol dehydrogenase	hisD_1 DSCA_18210	Desulfosarcina alkanivorans	437
A0A5P9F707	unreviewed	A0A5P9F707_9RHOB	Sulfopropanediol 3-dehydrogenase (EC 1.1.1.308) (2,3-dihydroxypropane-1-sulfonate 3-dehydrogenase (sulfolactate forming)) (DHPS 3-dehydrogenase (sulfolactate forming))	hpsN FIU94_08495	Sulfitobacter sp. THAF37	435
A0A5P9H4R8	unreviewed	A0A5P9H4R8_9RHOB	Sulfopropanediol 3-dehydrogenase (EC 1.1.1.308) (2,3-dihydroxypropane-1-sulfonate 3-dehydrogenase (sulfolactate forming)) (DHPS 3-dehydrogenase (sulfolactate forming))	hpsN2 hpsN FIU89_13955	Roseovarius sp. THAF27	435
A0A5P9ITL7	unreviewed	A0A5P9ITL7_9GAMM	Sulfopropanediol 3-dehydrogenase (EC 1.1.1.308) (2,3-dihydroxypropane-1-sulfonate 3-dehydrogenase (sulfolactate forming)) (DHPS 3-dehydrogenase (sulfolactate forming))	hpsN2 hpsN FIU83_12725	Halomonas sp. THAF5a	437
A0A5S3PIT6	unreviewed	A0A5S3PIT6_9RHOB	Sulfopropanediol 3-dehydrogenase (EC 1.1.1.308) (2,3-dihydroxypropane-1-sulfonate 3-dehydrogenase (sulfolactate forming)) (DHPS 3-dehydrogenase (sulfolactate forming))	hisD hpsN FDT80_01020	Sulfitobacter sabulilitoris	435
A0A640VWN6	unreviewed	A0A640VWN6_9RHOB	Sulfopropanediol 3-dehydrogenase (EC 1.1.1.308) (2,3-dihydroxypropane-1-sulfonate 3-dehydrogenase (sulfolactate forming)) (DHPS 3-dehydrogenase (sulfolactate forming))	hisD_2 hpsN So717_43060	Roseobacter cerasinus	435
A0A6I1E7P8	unreviewed	A0A6I1E7P8_9RHOB	Sulfopropanediol 3-dehydrogenase (EC 1.1.1.308) (2,3-dihydroxypropane-1-sulfonate 3-dehydrogenase (sulfolactate forming)) (DHPS 3-dehydrogenase (sulfolactate forming))	hisD hpsN F9L33_15200	Amylibacter sp. SFDW26	435
A0A6I6ISL3	unreviewed	A0A6I6ISL3_9RHOB	Sulfopropanediol 3-dehydrogenase (EC 1.1.1.308) (2,3-dihydroxypropane-1-sulfonate 3-dehydrogenase (sulfolactate forming)) (DHPS 3-dehydrogenase (sulfolactate forming))	hisD hpsN EI983_18900	Roseovarius faecimaris	435
A0A6J4XVZ9	unreviewed	A0A6J4XVZ9_9DELT	Putative histidinol dehydrogenase (But probably not)	D1AOALGA4SA_3346	Olavius algarvensis Delta 1 endosymbiont	433
A0A6L5YW36	unreviewed	A0A6L5YW36_9RHOB	Sulfopropanediol 3-dehydrogenase (EC 1.1.1.308) (2,3-dihydroxypropane-1-sulfonate 3-dehydrogenase (sulfolactate forming)) (DHPS 3-dehydrogenase (sulfolactate forming))	hisD hpsN GE300_02620	Halovulum marinum	435
A0A6M1MTR4	unreviewed	A0A6M1MTR4_9RHOB	Histidinol dehydrogenase (EC 1.1.1.23)	hisD G5B31_20135	Rhodobacter sp. SGA-6-6	436
A0A6N8ACZ4	unreviewed	A0A6N8ACZ4_9HYPH	Sulfopropanediol 3-dehydrogenase (EC 1.1.1.308) (2,3-dihydroxypropane-1-sulfonate 3-dehydrogenase (sulfolactate forming)) (DHPS 3-dehydrogenase (sulfolactate forming))	hisD hpsN E1297_45400	Roseibium sp. RKSG952	435
A0A6P0C9X9	unreviewed	A0A6P0C9X9_9RHOB	Sulfopropanediol 3-dehydrogenase (EC 1.1.1.308) (2,3-dihydroxypropane-1-sulfonate 3-dehydrogenase (sulfolactate forming)) (DHPS 3-dehydrogenase (sulfolactate forming))	hisD hpsN GV827_05815	Sulfitobacter sediminilitoris	435
A0A6P1SZ71	unreviewed	A0A6P1SZ71_9RHOB	Histidinol dehydrogenase (EC 1.1.1.23)	hisD GO499_11575	Algicella marina	434
A0A6P1YSH3	unreviewed	A0A6P1YSH3_9HYPH	Histidinol dehydrogenase (EC 1.1.1.23)	hisD G3A50_21635	Ancylobacter pratisalsi	436
A0A7C9N337	unreviewed	A0A7C9N337_9RHOB	Sulfopropanediol 3-dehydrogenase (EC 1.1.1.308) (2,3-dihydroxypropane-1-sulfonate 3-dehydrogenase (sulfolactate forming)) (DHPS 3-dehydrogenase (sulfolactate forming))	hisD hpsN GQ651_17775	Kangsaoukella pontilimi	435
A0A7I8MTE8	unreviewed	A0A7I8MTE8_9DELT	Putative histidinol dehydrogenase (But probably not)	D3OALGA1CA_2055	Olavius algarvensis associated proteobacterium Delta 3	433
A0A7R6SUW5	unreviewed	A0A7R6SUW5_9GAMM	Sulfopropanediol 3-dehydrogenase (EC 1.1.1.308)	NEJAP_0151	Neptunomonas japonica JAMM 1380	435
A0A7S8C5C3	unreviewed	A0A7S8C5C3_9HYPH	Sulfopropanediol 3-dehydrogenase (EC 1.1.1.308) (2,3-dihydroxypropane-1-sulfonate 3-dehydrogenase (sulfolactate forming)) (DHPS 3-dehydrogenase (sulfolactate forming))	hisD hpsN HW532_13965	Kaustia mangrovi	435
A0A7S9LS42	unreviewed	A0A7S9LS42_9RHOB	Histidinol dehydrogenase (EC 1.1.1.23)	hisD I0K15_20480	Pontivivens ytuae	433
A0A7W9BIW3	unreviewed	A0A7W9BIW3_9RHOB	Sulfopropanediol 3-dehydrogenase (EC 1.1.1.308)	FHS72_000659	Loktanella ponticola	435
A0A7X2KDE7	unreviewed	A0A7X2KDE7_9PROT	Sulfopropanediol 3-dehydrogenase (EC 1.1.1.308) (2,3-dihydroxypropane-1-sulfonate 3-dehydrogenase (sulfolactate forming)) (DHPS 3-dehydrogenase (sulfolactate forming))	hisD hpsN GH722_05620	Alphaproteobacteria bacterium HT1-32	434
A0A7X3SA14	unreviewed	A0A7X3SA14_9HYPH	Sulfopropanediol 3-dehydrogenase (EC 1.1.1.308) (2,3-dihydroxypropane-1-sulfonate 3-dehydrogenase (sulfolactate forming)) (DHPS 3-dehydrogenase (sulfolactate forming))	hisD hpsN GR183_21565	Stappia sediminis	435
A0A7Y7CRL9	unreviewed	A0A7Y7CRL9_9GAMM	Sulfopropanediol 3-dehydrogenase (EC 1.1.1.308) (2,3-dihydroxypropane-1-sulfonate 3-dehydrogenase (sulfolactate forming)) (DHPS 3-dehydrogenase (sulfolactate forming))	hisD hpsN HWE12_00320	Oceanospirillaceae bacterium	434
A0A839V543	unreviewed	A0A839V543_9GAMM	Sulfopropanediol 3-dehydrogenase (EC 1.1.1.308) (2,3-dihydroxypropane-1-sulfonate 3-dehydrogenase (sulfolactate forming)) (DHPS 3-dehydrogenase (sulfolactate forming))	hpsN FHR94_001745	Halomonas cerina	437
A0A840WZ20	unreviewed	A0A840WZ20_9RHOB	Sulfopropanediol 3-dehydrogenase (EC 1.1.1.308) (2,3-dihydroxypropane-1-sulfonate 3-dehydrogenase (sulfolactate forming)) (DHPS 3-dehydrogenase (sulfolactate forming))	hpsN FHS89_002411	Rubricella aquisinus	435
A0A843RJM6	unreviewed	A0A843RJM6_9PROT	Sulfopropanediol 3-dehydrogenase (EC 1.1.1.308) (2,3-dihydroxypropane-1-sulfonate 3-dehydrogenase (sulfolactate forming)) (DHPS 3-dehydrogenase (sulfolactate forming))	hisD hpsN GEU89_19265	Kiloniellaceae bacterium	435
A0A844CHT0	unreviewed	A0A844CHT0_9RHOB	Sulfopropanediol 3-dehydrogenase (EC 1.1.1.308) (2,3-dihydroxypropane-1-sulfonate 3-dehydrogenase (sulfolactate forming)) (DHPS 3-dehydrogenase (sulfolactate forming))	hisD hpsN FDP25_05440	Roseovarius bejariae	435
A0A844H4G7	unreviewed	A0A844H4G7_9RHOB	Histidinol dehydrogenase (EC 1.1.1.23)	hisD GL279_14825	Paracoccus limosus	437
A0A848K2G9	unreviewed	A0A848K2G9_9HYPH	Sulfopropanediol 3-dehydrogenase (EC 1.1.1.308) (2,3-dihydroxypropane-1-sulfonate 3-dehydrogenase (sulfolactate forming)) (DHPS 3-dehydrogenase (sulfolactate forming))	hpsN FHT36_004346	Xanthobacter sp. SG618	437
A0A849L6W4	unreviewed	A0A849L6W4_9RHOB	Sulfopropanediol 3-dehydrogenase (EC 1.1.1.308) (2,3-dihydroxypropane-1-sulfonate 3-dehydrogenase (sulfolactate forming)) (DHPS 3-dehydrogenase (sulfolactate forming))	hisD hpsN HMH01_15345	Halovulum dunhuangense	439
A0A858SR98	unreviewed	A0A858SR98_9RHOB	Sulfopropanediol 3-dehydrogenase (EC 1.1.1.308) (2,3-dihydroxypropane-1-sulfonate 3-dehydrogenase (sulfolactate forming)) (DHPS 3-dehydrogenase (sulfolactate forming))	hisD hpsN G3256_03870	Roseobacter ponti	435
A0A8I0FSC0	unreviewed	A0A8I0FSC0_9PROT	Histidinol dehydrogenase (EC 1.1.1.23)	hisD IDH30_04230	Pelagibacterales bacterium SAG-MED15	428
A0A8J2ZAR1	unreviewed	A0A8J2ZAR1_9PROT	Histidinol dehydrogenase	hisD GCM10010964_19910	Caldovatus sediminis	437
A0A8J3GWU4	unreviewed	A0A8J3GWU4_9RHOB	Sulfopropanediol 3-dehydrogenase (EC 1.1.1.308) (2,3-dihydroxypropane-1-sulfonate 3-dehydrogenase (sulfolactate forming)) (DHPS 3-dehydrogenase (sulfolactate forming))	hisD hpsN GCM10017056_18410	Seohaeicola zhoushanensis	435
A0A8J7JGF9	unreviewed	A0A8J7JGF9_9RHOB	Sulfopropanediol 3-dehydrogenase (EC 1.1.1.308) (2,3-dihydroxypropane-1-sulfonate 3-dehydrogenase (sulfolactate forming)) (DHPS 3-dehydrogenase (sulfolactate forming))	hisD hpsN JF290_07520	Arenibacterium arenosum	435
A0A8J7M6N5	unreviewed	A0A8J7M6N5_9RHOB	Sulfopropanediol 3-dehydrogenase (EC 1.1.1.308) (2,3-dihydroxypropane-1-sulfonate 3-dehydrogenase (sulfolactate forming)) (DHPS 3-dehydrogenase (sulfolactate forming))	hisD hpsN H0I76_04885	Thermohalobaculum xanthum	435
A0A916VLC1	unreviewed	A0A916VLC1_9RHOB	Sulfopropanediol 3-dehydrogenase (EC 1.1.1.308) (2,3-dihydroxypropane-1-sulfonate 3-dehydrogenase (sulfolactate forming)) (DHPS 3-dehydrogenase (sulfolactate forming))	hisD hpsN GCM10011498_01440	Amylibacter cionae	435
A0A916VMG7	unreviewed	A0A916VMG7_9RHOB	Sulfopropanediol 3-dehydrogenase (EC 1.1.1.308) (2,3-dihydroxypropane-1-sulfonate 3-dehydrogenase (sulfolactate forming)) (DHPS 3-dehydrogenase (sulfolactate forming))	hisD hpsN GCM10011498_01280	Amylibacter cionae	435
A0A916X0F9	unreviewed	A0A916X0F9_9HYPH	Sulfopropanediol 3-dehydrogenase (EC 1.1.1.308) (2,3-dihydroxypropane-1-sulfonate 3-dehydrogenase (sulfolactate forming)) (DHPS 3-dehydrogenase (sulfolactate forming))	hisD hpsN GCM10011316_15020	Roseibium aquae	437
A0A917ABT7	unreviewed	A0A917ABT7_9RHOB	Sulfopropanediol 3-dehydrogenase (EC 1.1.1.308) (2,3-dihydroxypropane-1-sulfonate 3-dehydrogenase (sulfolactate forming)) (DHPS 3-dehydrogenase (sulfolactate forming))	hisD hpsN GCM10011517_06020	Actibacterium pelagium	435
A0A917EM52	unreviewed	A0A917EM52_9RHOB	Sulfopropanediol 3-dehydrogenase (EC 1.1.1.308) (2,3-dihydroxypropane-1-sulfonate 3-dehydrogenase (sulfolactate forming)) (DHPS 3-dehydrogenase (sulfolactate forming))	hisD hpsN GCM10011517_32150	Actibacterium pelagium	435
A0A924TC37	unreviewed	A0A924TC37_9BURK	Sulfopropanediol 3-dehydrogenase (EC 1.1.1.308) (2,3-dihydroxypropane-1-sulfonate 3-dehydrogenase (sulfolactate forming)) (DHPS 3-dehydrogenase (sulfolactate forming))	hisD hpsN H7143_01995	Rhizobacter sp	437
A0A926LSX3	unreviewed	A0A926LSX3_9PROT	Histidinol dehydrogenase (EC 1.1.1.23)	hisD IDH19_00600	Pelagibacterales bacterium SAG-MED48	428
A0A926LTT9	unreviewed	A0A926LTT9_9PROT	Histidinol dehydrogenase (EC 1.1.1.23)	hisD IDH23_02295	Pelagibacterales bacterium SAG-MED44	428
A0A926LWH8	unreviewed	A0A926LWH8_9PROT	Histidinol dehydrogenase (EC 1.1.1.23)	hisD IDH33_01025	Pelagibacterales bacterium SAG-MED43	428
A0A926LXA5	unreviewed	A0A926LXA5_9PROT	Histidinol dehydrogenase (EC 1.1.1.23)	hisD IDH18_02835	Pelagibacterales bacterium SAG-MED41	428
A0A926M0G5	unreviewed	A0A926M0G5_9PROT	Histidinol dehydrogenase (EC 1.1.1.23)	hisD IDH27_00550	Pelagibacterales bacterium SAG-MED46	428
A0A926MC90	unreviewed	A0A926MC90_9PROT	Histidinol dehydrogenase (EC 1.1.1.23)	hisD IDH11_00845	Pelagibacterales bacterium SAG-MED30	428
A0A926MFD8	unreviewed	A0A926MFD8_9PROT	Histidinol dehydrogenase (EC 1.1.1.23)	hisD IDH05_03245	Pelagibacterales bacterium SAG-MED27	405
A0A926MMT7	unreviewed	A0A926MMT7_9PROT	Histidinol dehydrogenase (EC 1.1.1.23)	hisD IDG97_00740	Pelagibacterales bacterium SAG-MED18	428
A0A926MQG3	unreviewed	A0A926MQG3_9PROT	Histidinol dehydrogenase (EC 1.1.1.23)	hisD IDH10_04450	Pelagibacterales bacterium SAG-MED20	428
A0A926MU74	unreviewed	A0A926MU74_9PROT	Histidinol dehydrogenase (EC 1.1.1.23)	hisD IDG98_03960	Pelagibacterales bacterium SAG-MED17	428
A0A926MX49	unreviewed	A0A926MX49_9PROT	Histidinol dehydrogenase (EC 1.1.1.23)	hisD IDG51_03490	Pelagibacterales bacterium SAG-MED14	428
A0A926N1I0	unreviewed	A0A926N1I0_9PROT	Histidinol dehydrogenase (EC 1.1.1.23)	hisD IDH07_01050	Pelagibacterales bacterium SAG-MED04	428
A0A926N547	unreviewed	A0A926N547_9PROT	Histidinol dehydrogenase (EC 1.1.1.23)	hisD IDG88_01085	Pelagibacterales bacterium SAG-MED03	428
A0A926RAP4	unreviewed	A0A926RAP4_9PROT	Histidinol dehydrogenase (EC 1.1.1.23)	hisD IDH13_01715	Pelagibacterales bacterium SAG-MED34	428
A0A926RBQ5	unreviewed	A0A926RBQ5_9PROT	Histidinol dehydrogenase (EC 1.1.1.23)	hisD IDH09_03845	Pelagibacterales bacterium SAG-MED28	428
A0A926RRT9	unreviewed	A0A926RRT9_9PROT	Histidinol dehydrogenase (EC 1.1.1.23)	hisD IDG78_04240	Pelagibacterales bacterium SAG-MED05	428
A0A927CZL7	unreviewed	A0A927CZL7_9RHOB	Sulfopropanediol 3-dehydrogenase (EC 1.1.1.308) (2,3-dihydroxypropane-1-sulfonate 3-dehydrogenase (sulfolactate forming)) (DHPS 3-dehydrogenase (sulfolactate forming))	hisD hpsN H9Q16_00260	Sulfitobacter aestuariivivens	435
A0A934IEF9	unreviewed	A0A934IEF9_9RHOB	Sulfopropanediol 3-dehydrogenase (EC 1.1.1.308) (2,3-dihydroxypropane-1-sulfonate 3-dehydrogenase (sulfolactate forming)) (DHPS 3-dehydrogenase (sulfolactate forming))	hisD hpsN ILP92_04205	Tranquillimonas pontilimi	435
A0A940CK33	unreviewed	A0A940CK33_9PROT	Histidinol dehydrogenase (EC 1.1.1.23)	hisD HVK32_03680	Pelagibacteraceae bacterium	426
A0A940ED63	unreviewed	A0A940ED63_9RHOB	Sulfopropanediol 3-dehydrogenase (EC 1.1.1.308) (2,3-dihydroxypropane-1-sulfonate 3-dehydrogenase (sulfolactate forming)) (DHPS 3-dehydrogenase (sulfolactate forming))	hisD hpsN J7394_21550	Ruegeria sp. R13_0	435
A0A940IRI6	unreviewed	A0A940IRI6_9RHOB	Sulfopropanediol 3-dehydrogenase (EC 1.1.1.308) (2,3-dihydroxypropane-1-sulfonate 3-dehydrogenase (sulfolactate forming)) (DHPS 3-dehydrogenase (sulfolactate forming))	hisD hpsN J7394_18820	Ruegeria sp. R13_0	435
A0A942LT20		A0A942LT20_9RHOB	deleted
A0A953VB70	unreviewed	A0A953VB70_9GAMM	Sulfopropanediol 3-dehydrogenase (EC 1.1.1.308) (2,3-dihydroxypropane-1-sulfonate 3-dehydrogenase (sulfolactate forming)) (DHPS 3-dehydrogenase (sulfolactate forming))	hisD hpsN KGQ96_01535	Modicisalibacter sp. R2A 31.J	437
A0A967EYX5	unreviewed	A0A967EYX5_9HYPH	Sulfopropanediol 3-dehydrogenase (EC 1.1.1.308) (2,3-dihydroxypropane-1-sulfonate 3-dehydrogenase (sulfolactate forming)) (DHPS 3-dehydrogenase (sulfolactate forming))	hisD hpsN HBA54_15380	Pelagibius litoralis	435
A0A972JN47	unreviewed	A0A972JN47_9RHOB	Sulfopropanediol 3-dehydrogenase (EC 1.1.1.308) (2,3-dihydroxypropane-1-sulfonate 3-dehydrogenase (sulfolactate forming)) (DHPS 3-dehydrogenase (sulfolactate forming))	hisD hpsN GTF92_13775	Roseobacter sp. HKCCD8822	435
A0A975DQU6	unreviewed	A0A975DQU6_9HYPH	Sulfopropanediol 3-dehydrogenase (EC 1.1.1.308) (2,3-dihydroxypropane-1-sulfonate 3-dehydrogenase (sulfolactate forming)) (DHPS 3-dehydrogenase (sulfolactate forming))	hisD hpsN J5J86_01670	Aquabacter sp. L1I39	437
A0A975W6K9	unreviewed	A0A975W6K9_9RHOB	Sulfopropanediol 3-dehydrogenase (EC 1.1.1.308) (2,3-dihydroxypropane-1-sulfonate 3-dehydrogenase (sulfolactate forming)) (DHPS 3-dehydrogenase (sulfolactate forming))	hpsN SAMN04487940_101381	Marinovum algicola	435
A0A975W7V9	unreviewed	A0A975W7V9_9RHOB	Sulfopropanediol 3-dehydrogenase (EC 1.1.1.308) (2,3-dihydroxypropane-1-sulfonate 3-dehydrogenase (sulfolactate forming)) (DHPS 3-dehydrogenase (sulfolactate forming))	hpsN SAMN04487940_102266	Marinovum algicola	435
A1WFZ2	unreviewed	A1WFZ2_VEREI	Sulfopropanediol 3-dehydrogenase (EC 1.1.1.308) (2,3-dihydroxypropane-1-sulfonate 3-dehydrogenase (sulfolactate forming)) (DHPS 3-dehydrogenase (sulfolactate forming))	hpsN Veis_0769	Verminephrobacter eiseniae (strain EF01-2)	437
A3JST3	unreviewed	A3JST3_9RHOB	Sulfopropanediol 3-dehydrogenase (EC 1.1.1.308) (2,3-dihydroxypropane-1-sulfonate 3-dehydrogenase (sulfolactate forming)) (DHPS 3-dehydrogenase (sulfolactate forming))	hisD hpsN RB2150_02474	Rhodobacteraceae bacterium HTCC2150	434
A3SJU4	unreviewed	A3SJU4_ROSNI	Sulfopropanediol 3-dehydrogenase (EC 1.1.1.308) (2,3-dihydroxypropane-1-sulfonate 3-dehydrogenase (sulfolactate forming)) (DHPS 3-dehydrogenase (sulfolactate forming))	hpsN ISM_05010	Roseovarius nubinhibens (strain ATCC BAA-591 / DSM 15170 / ISM)	435
A4ESX9	unreviewed	A4ESX9_9RHOB	Sulfopropanediol 3-dehydrogenase (EC 1.1.1.308) (2,3-dihydroxypropane-1-sulfonate 3-dehydrogenase (sulfolactate forming)) (DHPS 3-dehydrogenase (sulfolactate forming))	hisD hpsN RSK20926_07172	Roseobacter sp. SK209-2-6	435
A4EX75	unreviewed	A4EX75_9RHOB	Histidinol dehydrogenase (EC 1.1.1.37)	hisD RSK20926_14084	Roseobacter sp. SK209-2-6	417
A8LPR9	unreviewed	A8LPR9_DINSH	Sulfopropanediol 3-dehydrogenase (EC 1.1.1.308) (2,3-dihydroxypropane-1-sulfonate 3-dehydrogenase (sulfolactate forming)) (DHPS 3-dehydrogenase (sulfolactate forming))	hisD2 hpsN Dshi_2034	Dinoroseobacter shibae (strain DSM 16493 / NCIMB 14021 / DFL 12)	435
A9CXT5	unreviewed	A9CXT5_HOEPD	Sulfopropanediol 3-dehydrogenase (EC 1.1.1.308) (2,3-dihydroxypropane-1-sulfonate 3-dehydrogenase (sulfolactate forming)) (DHPS 3-dehydrogenase (sulfolactate forming))	hpsN HPDFL43_21037	Hoeflea phototrophica (strain DSM 17068 / NCIMB 14078 / DFL-43)	438
B6B377	unreviewed	B6B377_9RHOB	Sulfopropanediol 3-dehydrogenase (EC 1.1.1.308) (2,3-dihydroxypropane-1-sulfonate 3-dehydrogenase (sulfolactate forming)) (DHPS 3-dehydrogenase (sulfolactate forming))	hisD_1 hpsN RB2083_732	Rhodobacteraceae bacterium HTCC2083	435
B6B862	unreviewed	B6B862_9RHOB	Histidinol dehydrogenase (EC 1.1.1.23)	hisD_2 RBY4I_2266	Rhodobacterales bacterium Y4I	425
B6BFL1	unreviewed	B6BFL1_9RHOB	Sulfopropanediol 3-dehydrogenase (EC 1.1.1.308) (2,3-dihydroxypropane-1-sulfonate 3-dehydrogenase (sulfolactate forming)) (DHPS 3-dehydrogenase (sulfolactate forming))	hisD_3 hpsN RBY4I_4123	Rhodobacterales bacterium Y4I	435
B6BSY8	unreviewed	B6BSY8_PELS7	Histidinol dehydrogenase (EC 1.1.1.23)	hisD_2 PB7211_888	Pelagibacter sp. (strain HTCC7211)	428
C7DCX1	unreviewed	C7DCX1_9RHOB	Sulfopropanediol 3-dehydrogenase (EC 1.1.1.308) (2,3-dihydroxypropane-1-sulfonate 3-dehydrogenase (sulfolactate forming)) (DHPS 3-dehydrogenase (sulfolactate forming))	hisD_1 hpsN TR2A62_0124	Thalassobium sp. R2A62	435
D0I9Q1	unreviewed	D0I9Q1_GRIHO	Sulfopropanediol 3-dehydrogenase (EC 1.1.1.308) (2,3-dihydroxypropane-1-sulfonate 3-dehydrogenase (sulfolactate forming)) (DHPS 3-dehydrogenase (sulfolactate forming))	hpsN VHA_002188	Grimontia hollisae CIP 101886	434
D5BNU7	unreviewed	D5BNU7_PUNMI	Histidinol dehydrogenase (EC 1.1.1.23)	SAR116_2138	Puniceispirillum marinum (strain IMCC1322)	430
E0MQS2	unreviewed	E0MQS2_9HYPH	Sulfopropanediol 3-dehydrogenase (EC 1.1.1.308) (2,3-dihydroxypropane-1-sulfonate 3-dehydrogenase (sulfolactate forming)) (DHPS 3-dehydrogenase (sulfolactate forming))	hisD_2 hpsN R2A130_1223	Ahrensia sp. R2A130	435
E0MSR5	unreviewed	E0MSR5_9HYPH	Sulfopropanediol 3-dehydrogenase (EC 1.1.1.308) (2,3-dihydroxypropane-1-sulfonate 3-dehydrogenase (sulfolactate forming)) (DHPS 3-dehydrogenase (sulfolactate forming))	hisD_3 hpsN R2A130_2002	Ahrensia sp. R2A130	435
E2CFU8	unreviewed	E2CFU8_9HYPH	Sulfopropanediol 3-dehydrogenase (EC 1.1.1.308) (2,3-dihydroxypropane-1-sulfonate 3-dehydrogenase (sulfolactate forming)) (DHPS 3-dehydrogenase (sulfolactate forming))	hisD_3 hpsN TRICHSKD4_1929	Roseibium sp. TrichSKD4	435
F5Y4I2	unreviewed	F5Y4I2_RAMTT	Candidate histidinol dehydrogenase	hisD Rta_27270	Ramlibacter tataouinensis (strain ATCC BAA-407 / DSM 14655 / LMG 21543 / TTB310)	439
G1UV70	unreviewed	G1UV70_9BACT	Histidinol dehydrogenase 2	HMPREF1022_02444	Desulfovibrio sp. 6_1_46AFAA	437
G6A0A6	unreviewed	G6A0A6_9PROT	Histidinol dehydrogenase	HIMB100_00017160	SAR116 cluster alpha proteobacterium HIMB100	429
H5V6A5	unreviewed	H5V6A5_ATLHE	Histidinol dehydrogenase (HDH) (EC 1.1.1.23)	hisD EH105704_16_00420	Atlantibacter hermannii NBRC 105704	437
K2PGG0	unreviewed	K2PGG0_9HYPH	Sulfopropanediol 3-dehydrogenase (EC 1.1.1.308) (2,3-dihydroxypropane-1-sulfonate 3-dehydrogenase (sulfolactate forming)) (DHPS 3-dehydrogenase (sulfolactate forming))	hpsN NA8A_22466	Nitratireductor indicus C115	439
M9RIT8	unreviewed	M9RIT8_9RHOB	Sulfopropanediol 3-dehydrogenase (EC 1.1.1.308) (2,3-dihydroxypropane-1-sulfonate 3-dehydrogenase (sulfolactate forming)) (DHPS 3-dehydrogenase (sulfolactate forming))	hisD1 hpsN OA238_c24160	Octadecabacter arcticus 238	435
M9RXN9	unreviewed	M9RXN9_9RHOB	Sulfopropanediol 3-dehydrogenase (EC 1.1.1.308) (2,3-dihydroxypropane-1-sulfonate 3-dehydrogenase (sulfolactate forming)) (DHPS 3-dehydrogenase (sulfolactate forming))	hisD4 hpsN OA238_c48370	Octadecabacter arcticus 238	435
Q0FFD7	unreviewed	Q0FFD7_9RHOB	Sulfopropanediol 3-dehydrogenase (EC 1.1.1.308) (2,3-dihydroxypropane-1-sulfonate 3-dehydrogenase (sulfolactate forming)) (DHPS 3-dehydrogenase (sulfolactate forming))	hisD hpsN OM2255_05970	Rhodobacterales bacterium HTCC2255	435
Q161S1	unreviewed	Q161S1_ROSDO	Sulfopropanediol 3-dehydrogenase (EC 1.1.1.308) (2,3-dihydroxypropane-1-sulfonate 3-dehydrogenase (sulfolactate forming)) (DHPS 3-dehydrogenase (sulfolactate forming))	hisD hpsN RD1_3808	Roseobacter denitrificans (strain ATCC 33942 / OCh 114) (Erythrobacter sp. (strain OCh 114)) (Roseobacter denitrificans)	435
Q28SJ7	unreviewed	Q28SJ7_JANSC	Sulfopropanediol 3-dehydrogenase (EC 1.1.1.308) (2,3-dihydroxypropane-1-sulfonate 3-dehydrogenase (sulfolactate forming)) (DHPS 3-dehydrogenase (sulfolactate forming))	hpsN Jann_1398	Jannaschia sp. (strain CCS1)	435
Q4FMH0	reviewed	HISXH_PELUB	Histidinol dehydrogenase homolog (EC 1.1.-.-)	SAR11_0801	Pelagibacter ubique (strain HTCC1062)	428
Q5LVV1	reviewed	HPSN_RUEPO	Sulfopropanediol 3-dehydrogenase (EC 1.1.1.308) (2,3-dihydroxypropane-1-sulfonate 3-dehydrogenase (sulfolactate forming)) (DHPS 3-dehydrogenase (sulfolactate forming))	hpsN SPO0594	Ruegeria pomeroyi (strain ATCC 700808 / DSM 15171 / DSS-3) (Silicibacter pomeroyi)	435
S2KEX9	unreviewed	S2KEX9_HALAF	Sulfopropanediol 3-dehydrogenase (EC 1.1.1.308) (2,3-dihydroxypropane-1-sulfonate 3-dehydrogenase (sulfolactate forming)) (DHPS 3-dehydrogenase (sulfolactate forming))	hpsN L861_14220	Halomonas anticariensis (strain DSM 16096 / CECT 5854 / LMG 22089 / FP35)	437
S6HGS1	unreviewed	S6HGS1_9GAMM	Histidinol dehydrogenase	OFPI_40340	Osedax symbiont Rs2	435
U4KC93	unreviewed	U4KC93_9VIBR	Sulfopropanediol 3-dehydrogenase (EC 1.1.1.308) (2,3-dihydroxypropane-1-sulfonate 3-dehydrogenase (sulfolactate forming)) (DHPS 3-dehydrogenase (sulfolactate forming))	hpsN VIBNI_A1932	Vibrio nigripulchritudo	434
U4V193	unreviewed	U4V193_9RHOB	Sulfopropanediol 3-dehydrogenase (EC 1.1.1.308) (2,3-dihydroxypropane-1-sulfonate 3-dehydrogenase (sulfolactate forming)) (DHPS 3-dehydrogenase (sulfolactate forming))	hpsN HIMB11_01024	Rhodobacteraceae bacterium HIMB11	437
U5T3X9	unreviewed	U5T3X9_9GAMM	Histidinol dehydrogenase	SPICUR_05125	Spiribacter curvatus	440
V4Y2Q4	unreviewed	V4Y2Q4_9PROT	Sulfopropanediol 3-dehydrogenase (EC 1.1.1.308)	hpsN_1 MOLA814_00450	Betaproteobacteria bacterium MOLA814	440
W0PC38	unreviewed	W0PC38_ADVMD	Sulfopropanediol 3-dehydrogenase (EC 1.1.1.308) (2,3-dihydroxypropane-1-sulfonate 3-dehydrogenase (sulfolactate forming)) (DHPS 3-dehydrogenase (sulfolactate forming))	hisD2 hpsN MIM_c09530	Advenella mimigardefordensis (strain DSM 17166 / LMG 22922 / DPN7)	437
